# Supplementary figures and images for: Identification of Sitogluside as a Potential Skin‐Pigmentation‐Reducing Agent through Network Pharmacology
Source: Hindawi journal article supplement (doi:10.1155/2021/4883398), 2021-01-01

A

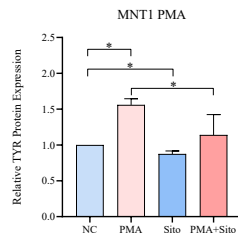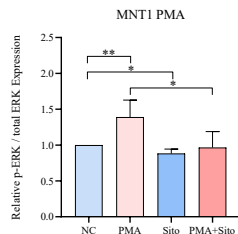

B

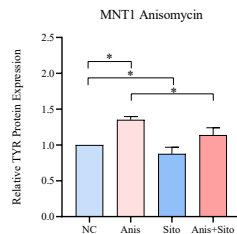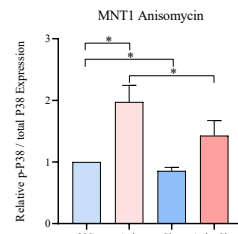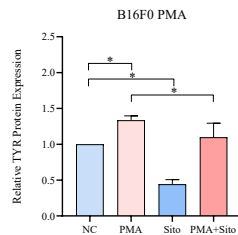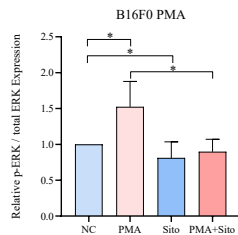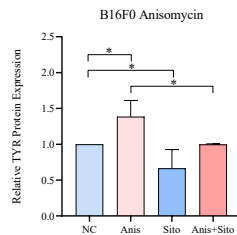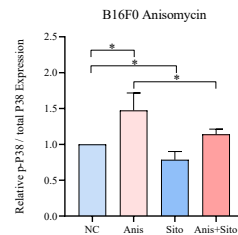

C

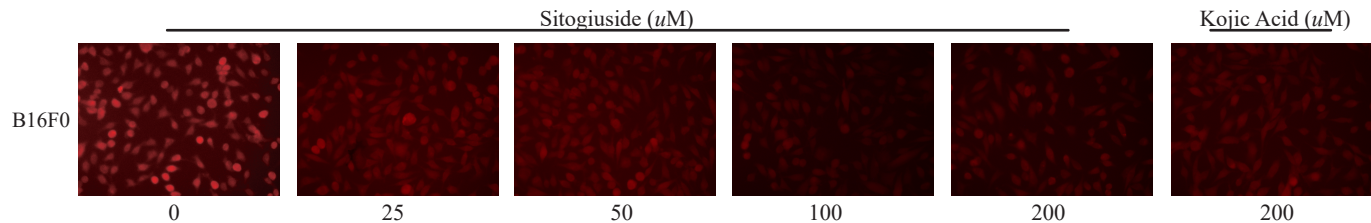

Supplement: f1 [file 4883398.f1.zip]

A

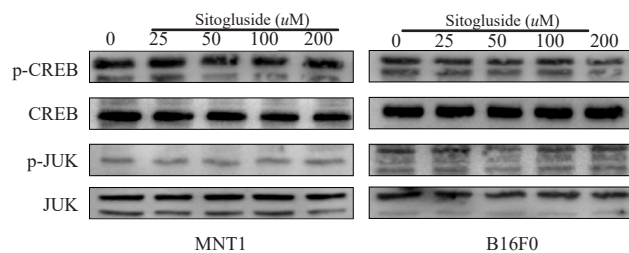

B

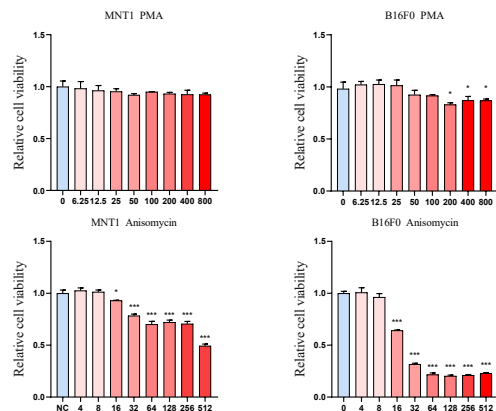

C

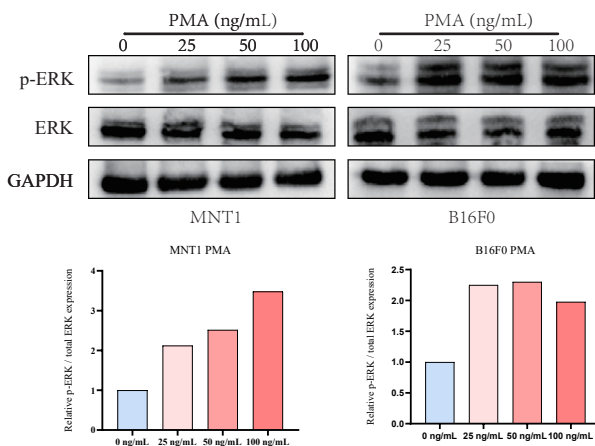

D

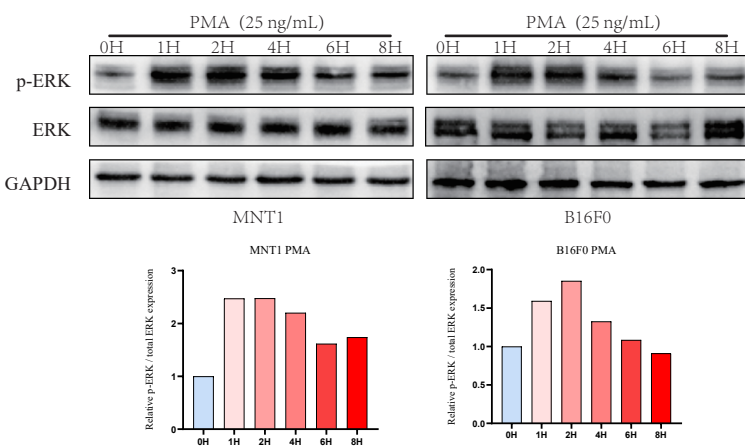

E

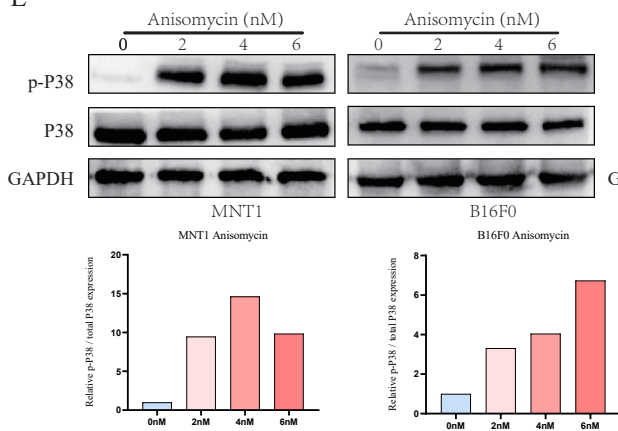

F

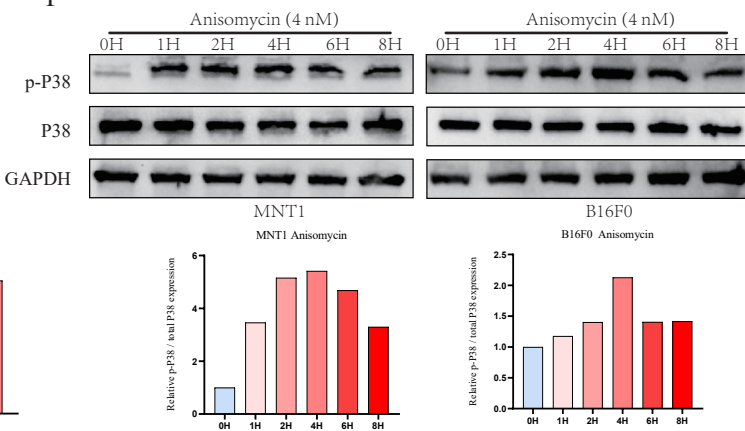

Supplement: f1 [file 4883398.f1.zip]
